# Supplementary material for: What Do US Physicians and Patients Think About Lipid‐Lowering Therapy and Goals of Treatment? Results From the GOULD Registry
Source: PubMed Central journal article supplement — J Am Heart Assoc. 2021 Aug 7;10(16):e020893. doi: 10.1161/JAHA.120.020893 (PMC8475019; doi:10.1161/jaha.120.020893), 2021-08-07
Supplement: JAH3-10-e020893-s001.pdf [file JAH3-10-e020893-s001.pdf]

# **SUPPLEMENTAL MATERIAL**

## Appendix

### List of GOULD Investigators

Listed below are the primary investigators representing the 119 enrolling sites in the US; listed in order of enrollment contribution.

Thomas Knickelbine, Abbott Northwestern Hospital Minneapolis Heart Institute; Charles Augenbraun, Cardiology Associates of Fairfield County; James Talano, Southwest Florida Research LLC; Faisal Wahid, Texas Institute of Cardiology; David Suh, NSC Research; Ranchhod Khant, Bay Area Cardiology; Shamaila Aslam, Northwest Houston Heart Center; Scott Merryman, McConnell Heart Health Center; David Herrington, Wake Forest University School of Medicine; Philip Patel, Eisenhower Desert Cardiology Center; Kenneth Fox, Family Medical Associates; Sumant Lamba, First Coast Cardiovascular Institute PA; Steven Brodie, HCP Clinical Research LLC; Neil Sheth, Radiant Research- Warner Family Practice PC; Kahlid Sheikh, Brevard Cardiovascular Research; Allen Geltzer, Synexus Clinical Research US Inc Overlake Internal Medicine Associates; Michael Lillestol, Lillestol Research LLC; Kamlesh Dave, Heart Care Associates; Stanley Koch, Koch Family Medicine; Steven Lupovitch, Northwest Heart Clinical Research LLC; Carlos Piniella, Clinical Research of Homestead; Lawrence Allen, Diagnostic Center of Medicine; Rakesh Vohra, Parkway Cardiology Associates; Steven Geller, Centennial Medical Group; Rohit Amin, Pensacola Research Consultants; Charles Michieli, Synexus Clinical Research Incorporated Orange Grove Family Practice; Philip Levin, Model Clinical Research Inc; Nicolas Shammass, Midwest Cardiovascular Research Foundation; Andrew Potler, East Mountain Medical Associates, PC; Vladimir Santos, Gad Research Center; Madaiah Revana, Humble Cardiology Associates; Ellis Lader, WMCHHealth Heart and Vascular Institute Kingston Division of Cardiology; David Strobl, Sparrow Clinical Research Institute; Megan Supple, Cone Health; Denes Korpas, Nebraska Heart Institute; Donna DeSantis, Radiant Research- East Valley Family Physicians; Debra Fuchs-Ertman, InterMed PA; Wael Eid, Saint Elizabeth Covington; Linda Calhoun, Cape Fear Heart Associates; Narendra Upadhyaya, Research Physicians Network Alliance; Ryan Cotter, Heart Institute of Colorado; James Maciejko, Ascension Saint John Hospital; Paul Ziajka, The Florida Lipid Institute; William Smith, Research Institute of Deaconess Clinic Downtown; Eduardo Antezano, UnityPoint Cardiology at Pleasant; Philip O Donnell, Selma Medical Associates; Lance Sloan, Texas Institute for Kidney and Endocrine Disorders; Vance Wilson, Daytona Heart Group; Denise Janosik, Mercy Research; James Kmetzo, Doylestown Health Cardiology; Sumana Gangi, Southern Endocrinology Associates PA; Neil Sheth, Synexus Clinical Research US, Inc; Chrisette Dharma, Southwest Family Medicine Associates; Darshan Godkar, Advanced Cardiology LLC; Philip Nicol, The Diabetes Center; Micheal Hong, Trinity Medical Western New York, PC; Catherine Popkin, Boca Raton Clinical Research Medical Center Inc; Rajesh Patel, Lycoming Internal Medicine Inc; Abelardo Vargas, New Phase Clinical Trials Corp; Minesh Patel, LaPorte County Institute for Clinical Research; Vikas Desai, Charles River Medical Associates; Yunsheng Ma, University of Massachusetts Medical School; Robert Block, University of Rochester Medical Center; Louis Hiotis, Radiant Research- Michigan Avenue Internists, LLC; Colby Grossman, Palmetto Clinical Research; Ahmed Arif, Ahmed Arif Medical Research Center LLC; Seth Baum, Excel Medical Clinical Trials; Carlos Sotolongo, Baptist Heart Specialists; Rebecca Jordan, Center for Clinical Trials of Sacramento Inc; Paul

Thompson, Hartford Hospital; Mark Napoli, Clinical Trials of America Inc; Robert Davidson, Consortium of Attending Physicians for Research Investigations LLC; Hugh Durrence, Pharmacorp Clinical Trials Inc; Karen Aspry, Miriam Hospital; Randall Miller, Horizon Research Group of Opelousas LLC; David Headley, David M Headley, MD, PA; Richard Rothschild, Cabrillo Cardiology Medical Group; Raymond Little, Houston Heart and Vascular Associates; Carl Meisner, Carl R Meisner Medical Clinic, PLLC; Richard Powell, Meridien Research Brooksville; Eliot Moon, Elite Clinical Trials Inc; Kul Aggarwal, University of Missouri Health System; Mark Turner, Advanced Clinical Research; Idalia Acosta, San Marcus Research Clinic Inc; Martin Schear, Dayton Clinical Research; Robert Harris, DeGarmo Institute of Medical Research; Robert Lending, Synexus Clinical Research United States Incorporated; Abraham Salacata, Endeavor Medical Research; Vicki Kalen, Eclipse Clinical Research; C David Bird, Premier Family Medicine; Caroline Mbogua, Discovery MM Services Inc, Yamirka Duardo- Guerra, LLC Medical Research, LLC, Deirdre McMullen, Discovery MM Services Inc; Hessam Aazami, Hope Clinical Research LLC; Charles Lovell, York Clinical Research LLC; Robert Busch, Albany Medical Center Community Division; Marek Janout, Kootenai Heart Clinics, LLC; Lawrence Alwine, Brandywine Clinical Research; Kim Barbel Johnson, Care Partners Clinical Research LLC; Svjetlana Dziko, Womens Clinic of Lincoln PC; John Larry, The Ohio State University, Wexner Medical Center; Joseph Cherian, Metropolitan Cardiology; Gregory Allen, Center for Medical Research LLC; Faye Vargas, Atlanta Vanguard Medical Associates; Stuart Zarich, Bridgeport Hospital; Armando Roperro-Cartier, Premier Clinical Research Institute; Milroy Samuel, Complete Healthcare for Women; Sandeep Khurana, Healthy Heart Cardiology; Lilia Rodriguez Ables, Finlay Medical Research; Marisela Gonzalez, Advance Research Center LLC; Gregston Nelson, Radiant Research- Omaha Primary Care Physicians; Lester de Leon, Advance Medical Research Service; Luis Martinez, Suncoast Research Group LLC; Francisco Badar, Core Healthcare Group; Thomas Phiambolis, Lanckenau Institute for Medical Research; Naseem Jaffrani, Alexandria Cardiology Clinic; John Eck, Advanced Clinical Research - Center for Lifetime Health; Brett Nowlan, Cottage Grove Cardiology; Trever Martin, Advanced Clinical Research - Foot and Ankle Clinic

**Table S1. Patient questionnaire results stratified by sex.**

|                                                                                                                                             | <b>Men<br/>n=3021</b> | <b>Women<br/>n=1985</b> | <b>p-value</b> |
|---------------------------------------------------------------------------------------------------------------------------------------------|-----------------------|-------------------------|----------------|
| What is your understanding of the main reason you are taking cholesterol medication?                                                        |                       |                         | 0.806          |
| To prevent a heart attack and/or stroke                                                                                                     | 28.3% (791/2797)      | 27.0% (497/1844)        |                |
| To lower cholesterol                                                                                                                        | 66.4% (1858/2797)     | 67.6% (1247/1844)       |                |
| To make you feel better                                                                                                                     | 1.1% (31/2797)        | 1.1% (21/1844)          |                |
| Don't know/not sure                                                                                                                         | 4.2% (117/2797)       | 4.3% (79/1844)          |                |
| What do you think is the leading cause of death for men in the United States?                                                               |                       |                         | <0.001         |
| Heart disease                                                                                                                               | 66.9% (1874/2803)     | 56.9% (1051/1846)       |                |
| Cancer                                                                                                                                      | 9.2% (258/2803)       | 11.3% (209/1846)        |                |
| Other                                                                                                                                       | 4.7% (131/2803)       | 3.3% (60/1846)          |                |
| Don't know/not sure                                                                                                                         | 19.3% (540/2803)      | 28.5% (526/1846)        |                |
| What do you think is the leading cause of death for women in the United States?                                                             |                       |                         | <0.001         |
| Heart disease                                                                                                                               | 40.1% (1125/2802)     | 55.7% (1029/1847)       |                |
| Cancer                                                                                                                                      | 29.7% (832/2802)      | 23.2% (429/1847)        |                |
| Other                                                                                                                                       | 2.5% (71/2802)        | 2.1% (38/1847)          |                |
| Don't know/not sure                                                                                                                         | 27.6% (774/2802)      | 19.0% (351/1847)        |                |
| Can you estimate the chance that you will have a heart attack or stroke within the next 10 years?                                           |                       |                         | <0.001         |
| Less than 5%                                                                                                                                | 12.6% (352/2793)      | 12.4% (227/1834)        |                |
| 5% to less than 10%                                                                                                                         | 9.3% (261/2793)       | 6.2% (113/1834)         |                |
| 10% to less than 20%                                                                                                                        | 7.8% (218/2793)       | 5.2% (95/1834)          |                |
| 20% to less than 50%                                                                                                                        | 9.0% (252/2793)       | 7.1% (131/1834)         |                |
| 50% or greater                                                                                                                              | 10.4% (290/2793)      | 8.6% (157/1834)         |                |
| Don't know/not sure                                                                                                                         | 50.8% (1420/2793)     | 60.6% (1111/1834)       |                |
| By how much do you think your cholesterol-lowering medication reduces your risk for having a heart attack or stroke over the next 10 years? |                       |                         | <0.001         |
| Less than 5%                                                                                                                                | 2.6% (72/2799)        | 4.2% (77/1845)          |                |
| 5% to less than 10%                                                                                                                         | 4.2% (118/2799)       | 4.2% (77/1845)          |                |
| 10% to less than 20%                                                                                                                        | 6.4% (178/2799)       | 5.2% (96/1845)          |                |
| 20% to less than 50%                                                                                                                        | 16.0% (449/2799)      | 11.4% (210/1845)        |                |
| 50% or greater                                                                                                                              | 32.8% (917/2799)      | 28.1% (519/1845)        |                |
| Don't know/not sure                                                                                                                         | 38.0% (1065/2799)     | 46.9% (866/1845)        |                |
| What is your LDL?                                                                                                                           |                       |                         | <0.001         |
| Less than 50 mg/dL                                                                                                                          | 5.5% (154/2803)       | 2.8% (52/1847)          |                |
| 50 mg/dL to less than 70 mg/dL                                                                                                              | 4.5% (126/2803)       | 3.6% (67/1847)          |                |
| 70 mg/dL to less than 100 mg/dL                                                                                                             | 15.7% (440/2803)      | 10.3% (190/1847)        |                |
| 100 mg/dL to less than 130 mg/dL                                                                                                            | 5.2% (146/2803)       | 6.1% (113/1847)         |                |
| 130 mg/dL or higher                                                                                                                         | 3.8% (107/2803)       | 4.4% (81/1847)          |                |
| Don't know/not sure                                                                                                                         | 65.3% (1830/2803)     | 72.8% (1344/1847)       |                |
| What should your LDL be according to your doctor?                                                                                           |                       |                         | <0.001         |
| Less than 50 mg/dL                                                                                                                          | 5.6% (156/2804)       | 3.5% (64/1847)          |                |
| 50 mg/dL to less than 70 mg/dL                                                                                                              | 9.8% (275/2804)       | 5.8% (107/1847)         |                |
| 70 mg/dL to less than 100 mg/dL                                                                                                             | 14.4% (403/2804)      | 11.8% (218/1847)        |                |
| 100 mg/dL to less than 130 mg/dL                                                                                                            | 3.0% (84/2804)        | 3.1% (58/1847)          |                |
| 130 mg/dL or higher                                                                                                                         | 1.2% (33/2804)        | 1.6% (30/1847)          |                |
| Don't know/not sure                                                                                                                         | 66.1% (1852/2804)     | 74.2% (1370/1847)       |                |

**Table S2. Questionnaire results stratified by age.**

|                                                                                                                                             | Age <65 years<br>n=1754 | Age ≥65 years<br>n=3251 | p-value |
|---------------------------------------------------------------------------------------------------------------------------------------------|-------------------------|-------------------------|---------|
| What is your understanding of the main reason you are taking cholesterol medication?                                                        |                         |                         | <0.001  |
| To prevent a heart attack/stroke                                                                                                            | 31.4% (509/1622)        | 25.8% (779/3019)        |         |
| To lower cholesterol                                                                                                                        | 63.6% (1031/1622)       | 68.7% (2074/3019)       |         |
| To make you feel better                                                                                                                     | 1.2% (19/1622)          | 1.1% (33/3019)          |         |
| Don't know/not sure                                                                                                                         | 3.9% (63/1622)          | 4.4% (133/3019)         |         |
| What do you think is the leading cause of death for men in the United States?                                                               |                         |                         | 0.178   |
| Heart disease                                                                                                                               | 64.0% (1042/1627)       | 62.3% (1883/3022)       |         |
| Cancer                                                                                                                                      | 8.8% (143/1627)         | 10.7% (324/3022)        |         |
| Other                                                                                                                                       | 3.9% (63/1627)          | 4.2% (128/3022)         |         |
| Don't know/not sure                                                                                                                         | 23.3% (379/1627)        | 22.7% (687/3022)        |         |
| What do you think is the leading cause of death for women in the United States?                                                             |                         |                         | 0.653   |
| Heart disease                                                                                                                               | 47.4% (771/1625)        | 45.7% (1383/3024)       |         |
| Cancer                                                                                                                                      | 26.3% (427/1625)        | 27.6% (834/3024)        |         |
| Other                                                                                                                                       | 2.5% (40/1625)          | 2.3% (69/3024)          |         |
| Don't know/not sure                                                                                                                         | 23.8% (387/1625)        | 24.4% (738/3024)        |         |
| Can you estimate the chance that you will have a heart attack or stroke within the next 10 years?                                           |                         |                         | 0.011   |
| Less than 5%                                                                                                                                | 12.8% (207/1620)        | 12.4% (372/3007)        |         |
| 5% to less than 10%                                                                                                                         | 8.8% (142/1620)         | 7.7% (232/3007)         |         |
| 10% to less than 20%                                                                                                                        | 6.7% (108/1620)         | 6.8% (205/3007)         |         |
| 20% to less than 50%                                                                                                                        | 8.5% (138/1620)         | 8.1% (245/3007)         |         |
| 50% or greater                                                                                                                              | 11.9% (193/1620)        | 8.4% (254/3007)         |         |
| Don't know/not sure                                                                                                                         | 51.4% (832/1620)        | 56.5% (1699/3007)       |         |
| By how much do you think your cholesterol-lowering medication reduces your risk for having a heart attack or stroke over the next 10 years? |                         |                         | 0.141   |
| Less than 5%                                                                                                                                | 2.9% (47/1622)          | 3.4% (102/3022)         |         |
| 5% to less than 10%                                                                                                                         | 3.9% (64/1622)          | 4.3% (131/3022)         |         |
| 10% to less than 20%                                                                                                                        | 5.5% (90/1622)          | 6.1% (184/3022)         |         |
| 20% to less than 50%                                                                                                                        | 14.4% (233/1622)        | 14.1% (426/3022)        |         |
| 50% or greater                                                                                                                              | 34.7% (563/1622)        | 28.9% (873/3022)        |         |
| Don't know/not sure                                                                                                                         | 38.5% (625/1622)        | 43.2% (1306/3022)       |         |
| What is your LDL?                                                                                                                           |                         |                         | 0.434   |
| Less than 50 mg/dL                                                                                                                          | 4.3% (70/1624)          | 4.5% (136/3026)         |         |
| 50 mg/dL to less than 70 mg/dL                                                                                                              | 3.2% (52/1624)          | 4.7% (141/3026)         |         |
| 70 mg/dL to less than 100 mg/dL                                                                                                             | 12.3% (199/1624)        | 14.2% (431/3026)        |         |
| 100 mg/dL to less than 130 mg/dL                                                                                                            | 6.7% (109/1624)         | 5.0% (150/3026)         |         |
| 130 mg/dL or higher                                                                                                                         | 5.3% (86/1624)          | 3.4% (102/3026)         |         |
| Don't know/not sure                                                                                                                         | 68.2% (1108/1624)       | 68.3% (2066/3026)       |         |
| What should your LDL be according to your doctor?                                                                                           |                         |                         | <0.001  |
| Less than 50 mg/dL                                                                                                                          | 5.7% (93/1625)          | 4.2% (127/3026)         |         |
| 50 mg/dL to less than 70 mg/dL                                                                                                              | 9.0% (146/1625)         | 7.8% (236/3026)         |         |
| 70 mg/dL to less than 100 mg/dL                                                                                                             | 14.0% (228/1625)        | 13.0% (393/3026)        |         |
| 100 mg/dL to less than 130 mg/dL                                                                                                            | 3.6% (59/1625)          | 2.7% (83/3026)          |         |
| 130 mg/dL or higher                                                                                                                         | 1.5% (25/1625)          | 1.3% (38/3026)          |         |
| Don't know/not sure                                                                                                                         | 66.1% (1074/1625)       | 71.0% (2149/3026)       |         |
